# Supplementary material for: Microstructure arrays of DNA using topographic control
Source: PubMed Central journal article supplement (PMC6555807; doi:10.1038/s41467-019-10540-2), 2019-06-07
Supplement: 41467_2019_10540_MOESM1_ESM.pdf [file 41467_2019_10540_MOESM1_ESM.pdf]

# Supplementary Information

## Microstructure arrays of DNA using topographic control

*Yun Jeong Cha<sup>1†</sup>, Soon Mo Park<sup>1†</sup>, Ra You<sup>1</sup>, Hyungsoo Kim<sup>2</sup> and Dong Ki Yoon<sup>1,3\*</sup>*

<sup>1</sup> Graduate School of Nanoscience and Technology, Korea Advanced Institute of Science and Technology, Daejeon 34141, Republic of Korea

<sup>2</sup> Department of Mechanical Engineering, Korea Advanced Institute of Science and Technology (KAIST), Daejeon 34141, Republic of Korea

<sup>3</sup> Department of Chemistry and KINC, Korea Advanced Institute of Science and Technology, Daejeon 34141, Republic of Korea

†These authors contributed equally to this work.

\*To whom correspondence should be addressed.

E-mail: [nandk@kaist.ac.kr](mailto:nandk@kaist.ac.kr)

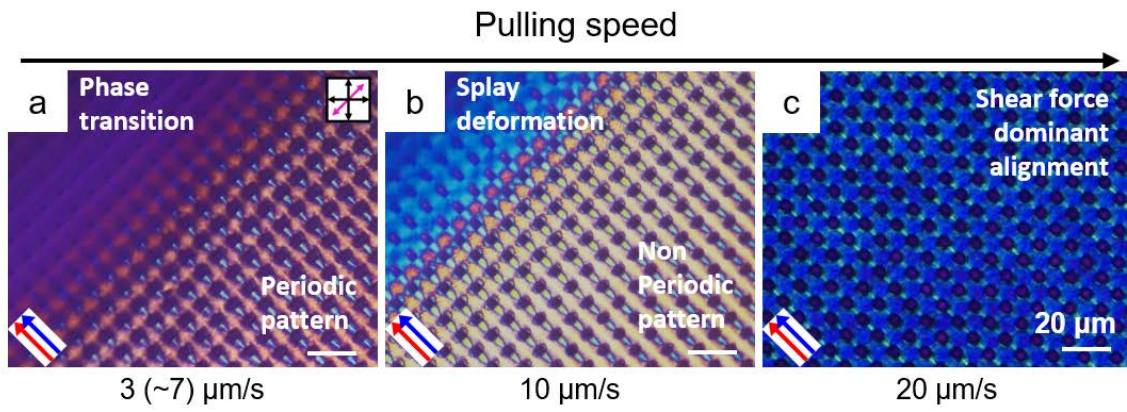

1

2 **Supplementary Figure 1.** DNA microstructure-generation depending on the pulling speed,

3 (a) 3~7  $\mu\text{m/s}$ . (b) 10  $\mu\text{m/s}$ , and (c) 20  $\mu\text{m/s}$ . All scales are 20  $\mu\text{m}$ .

4

5

1

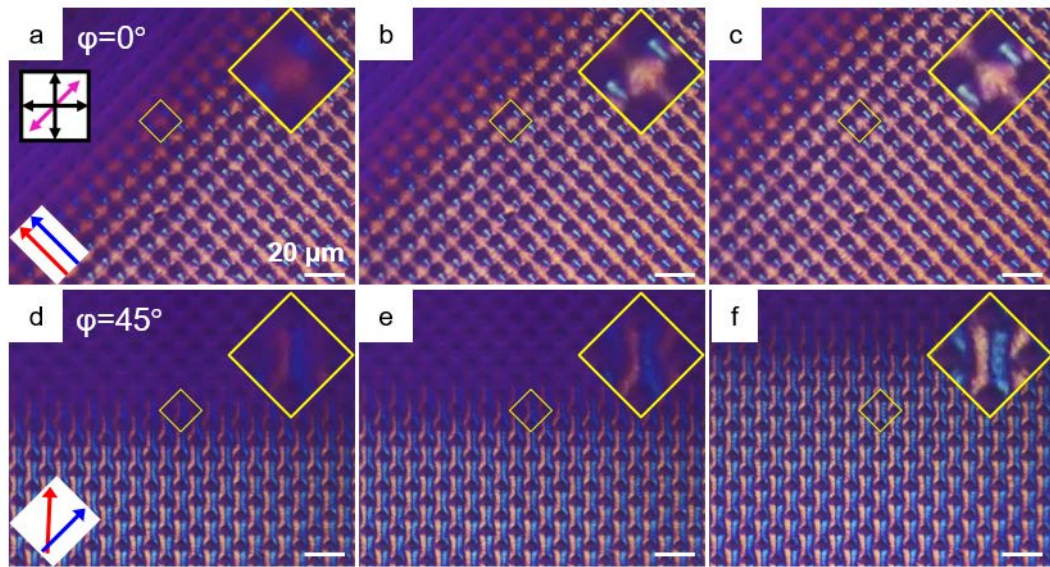

2

3

4 **Supplementary Figure 2.** Sequential growth of DNA microstructure at  $\phi = 0^\circ$  (a-c),  $\phi = 45^\circ$

5 (d-f) rotated  $\pm 45^\circ$  based on the original position. All scales are 20  $\mu\text{m}$ .

6

7

1

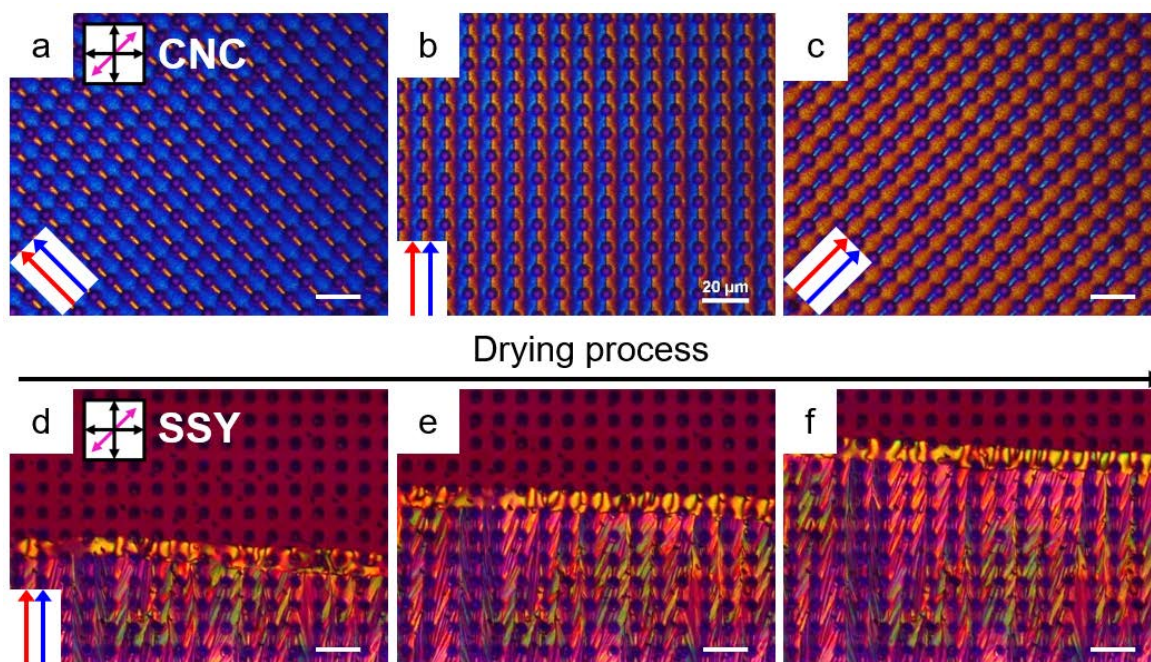

2

3 **Supplementary Figure 3.** Fabricated cellulose nanocrystal (CNC) microstructures using a  
4 concentration of 80 mg/ml at (b)  $\varphi = 0^\circ$  and by (a,c) rotating sample  $\pm 45^\circ$ ; (d-f) Drying  
5 process of sunset yellow (SSY) solution using a concentration of 350 mg/ml at  $\varphi = 0^\circ$  does  
6 not show the similar behavior with DNA's case. All scales are 20  $\mu\text{m}$ .

7

8

9

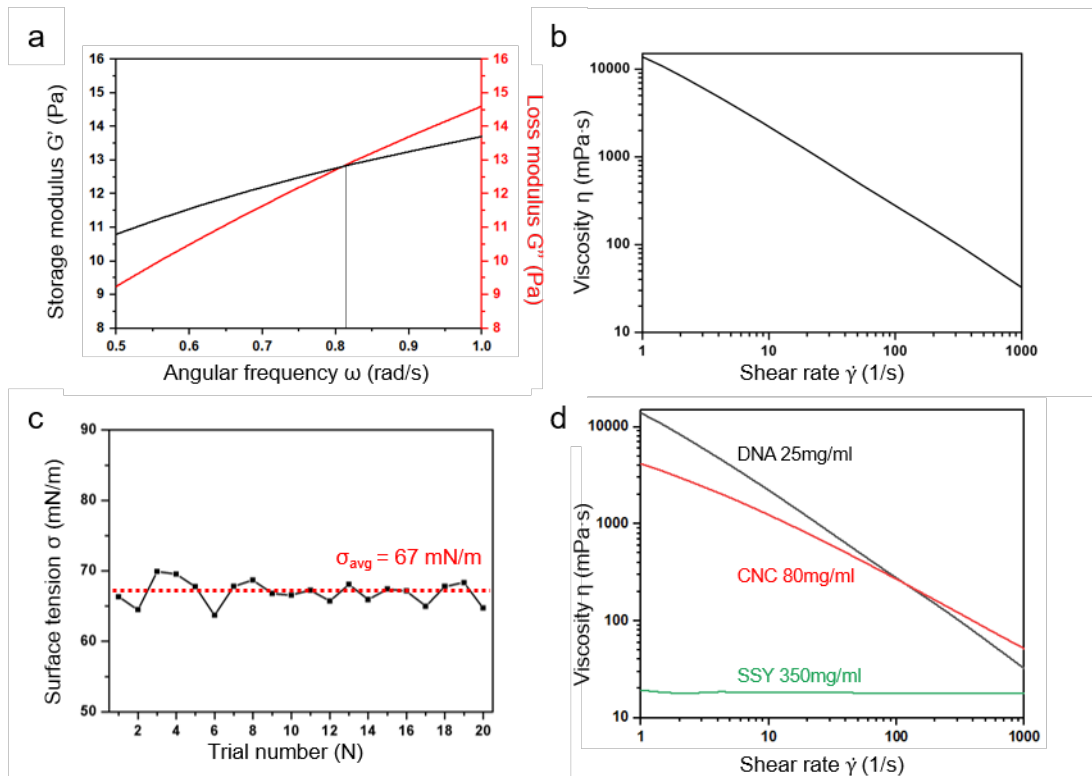

1  
2 **Supplementary Figure 4.** (a) Rheometer measurement of storage ( $G'$ ) and loss modulus  
3 ( $G''$ ), (b) shear rate-viscosity curve and (c) surface tension of 25 mg/ml DNA solution. (d)  
4 Comparison of shear-viscosity curves for DNA, CNC, and SSY. The results present that CNC  
5 and DNA show a shear-thinning behavior while SSY shows a Newtonian behaviour.

6  
7  
8  
9

10  
11  
12  
13  
14  
15  
16  
17

| Material                    | Persistence length ( $\lambda_p$ ) | Contour length (L) | Diameter (D) | Aspect ratio (L/D) & ( $\lambda_p/D$ ) | Flexibility ( $\lambda_p/L$ ) |
|-----------------------------|------------------------------------|--------------------|--------------|----------------------------------------|-------------------------------|
| Salmon sperm DNA (DNA)      | 50nm                               | 680nm              | 2nm          | 340(25)                                | Semiflexible                  |
| Sunset Yellow FCF (SSY)     | 10nm                               | $\geq 10$ nm       | 1nm          | $\geq 10$ (10)                         | Semiflexible                  |
| Cellulose nanocrystal (CNC) | 150nm                              | 300nm              | 10nm         | 30(15)                                 | Semiflexible                  |

1

2 **Supplementary Table 1.** Molecular scale properties of salmon sperm DNA (DNA), sunset

3 yellow FCF (SSY), and cellulose nanocrystal (CNC).

4
