# Supplementary material for: Microstructure arrays of DNA using topographic control
Source: PubMed Central journal article supplement (PMC6555807; doi:10.1038/s41467-019-10540-2), 2019-06-07
Supplement: 41467_2019_10540_MOESM3_ESM.pdf [file 41467_2019_10540_MOESM3_ESM.pdf]

## **Description of Additional Supplementary Files**

File Name: Supplementary Movie 1

Description: In-situ growing sequences in Fig. 2

File Name: Supplementary Movie 2

Description: In-situ growing sequences in Fig. 3

File Name: Supplementary Movie 3

Description: In-situ growing sequences in Supplementary Fig. 2
